# Supplementary material
Source: PubMed Central journal article supplement (PMC2896501)

## **Supporting Information**

### **Cloning, sequencing, heterologous expression and mechanistic analysis of A-74528 biosynthesis**

Kathia Zaleta-Rivera<sup>†‡</sup>, Louise K. Charkoudian<sup>†‡</sup>, Christian P. Ridley<sup>†</sup>, and  
Chaitan Khosla<sup>\*†§</sup>

*Departments of Chemistry, Chemical Engineering and Biochemistry, Stanford University, Stanford  
California 94305*

**Table S1:** Primers used in the preparation and identification of deletion mutants in the *san* gene cluster

| Table S1 PCR primers used for preparation and identification of <i>San-deleted mutants</i> |                                                              |
|--------------------------------------------------------------------------------------------|--------------------------------------------------------------|
| San2-20Fwd                                                                                 | TCTACGGGCACGAGCAAGTCTTCACGGAAGCGGTCGACTATTCCGGGGATCCGTCGACC  |
| San2-19Rev                                                                                 | TATGAGACAGGCAGGTCCACCGGCAACCTCCCCGAGTAGTGTAGGCTGGAGCTGCTTC   |
| San2-OutFwd                                                                                | AACGCTCATGATCCGAGCATCGG                                      |
| San2-OutRev                                                                                | TGGACCGACACGCTGAACATCG                                       |
| SanM-20Fwd                                                                                 | AGTCGTGATGCTTGAGGATGTGCTCAGCGCGGTCGTGCTATTCCGGGGATCCGTCGACC  |
| SanM-19Rev                                                                                 | CAAGCCCTTCGAGCGAGCGGTTGATCGGGACGTTGCCGATGTAGGCTGGAGCTGCTCS   |
| SanM-OutFw                                                                                 | GTAGTCGAGCAGCACTCCACAG                                       |
| SanM-OutRev                                                                                | GACTCAGTGGGGATGATCAGACG                                      |
| SanX-20Fwd                                                                                 | TTCTGACGCGCTCAGCGTCGCTGTCGGCCCTCGAAGGCGAATTCCGGGGATCCGTCGACC |
| SanX-19Rev                                                                                 | GGTCAACGTGTCAACGCCCCAGGTCCGGCGGTCGGTTCATGTAGGCTGGAGCTGCTTC   |
| SanX-OutFwd                                                                                | AGAAGGCGATGGTCAGCAGC                                         |
| SanX-OutRev                                                                                | TCTGCTGACGAAGTTCGTCC                                         |

**Figure S2:** Scheme of in-frame deletion mutants *sanX*, *sanM* and *san2* in the A-74528 gene cluster

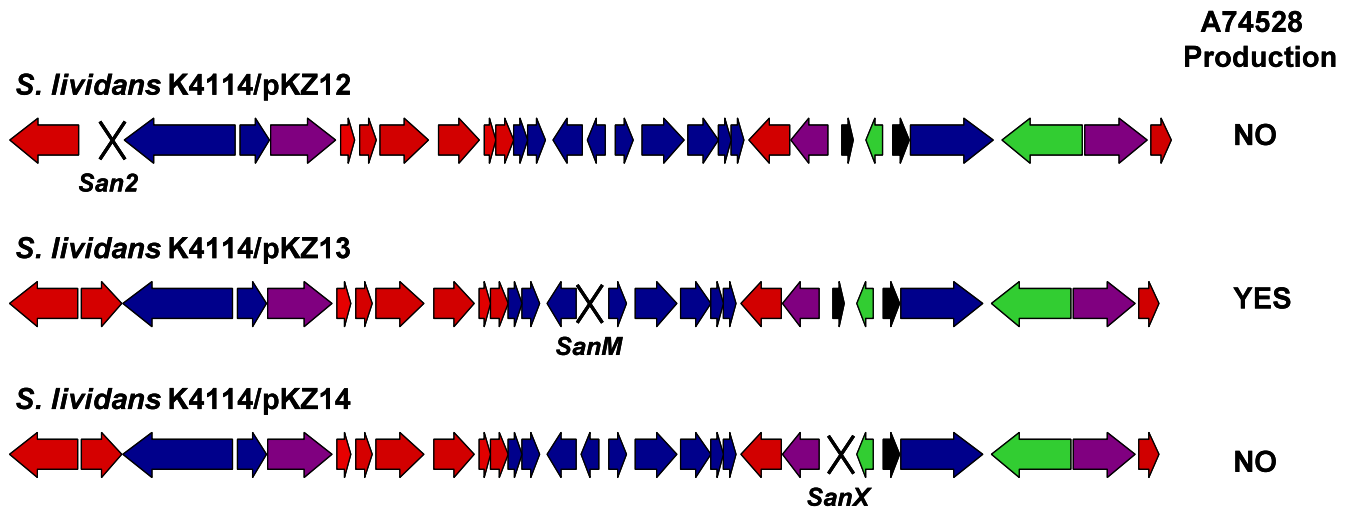

Supplement: NIHMS214543-supplement-1_si_001.pdf [file NIHMS214543-supplement-1_si_001.pdf]
